# Supplementary material for: One-step in situ synthesis of single aligned graphene–ZnO nanofiber for UV sensing
Source: Royal Society of Chemistry journal article supplement (doi:10.1039/c5ra15351d), 2015-01-01
Supplement: c5ra15351d1.pdf [file c5ra15351d1.pdf]

## Supporting Information

### One step in situ single aligned Graphene-ZnO nanofiber for UV sensing

Parikshit Sahatiya<sup>1</sup> and Sushmee Badhulika<sup>1\*</sup>

<sup>1</sup>Department of Electrical Engineering, Indian Institute of Technology Hyderabad, Hyderabad, Telangana – 502205 (India).

\*Corresponding author email: [sbadh@iith.ac.in](mailto:sbadh@iith.ac.in)

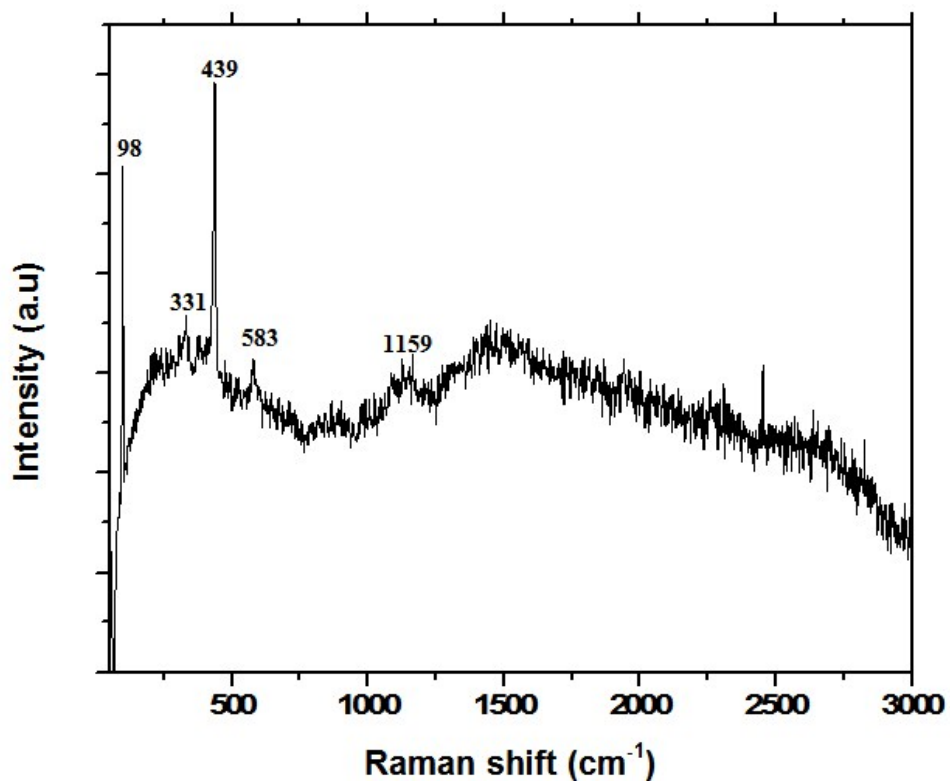

Fig S1: Raman spectra of Gr-ZnO composite nanofiber with 0.5wt. % graphene calcined at 600°C.

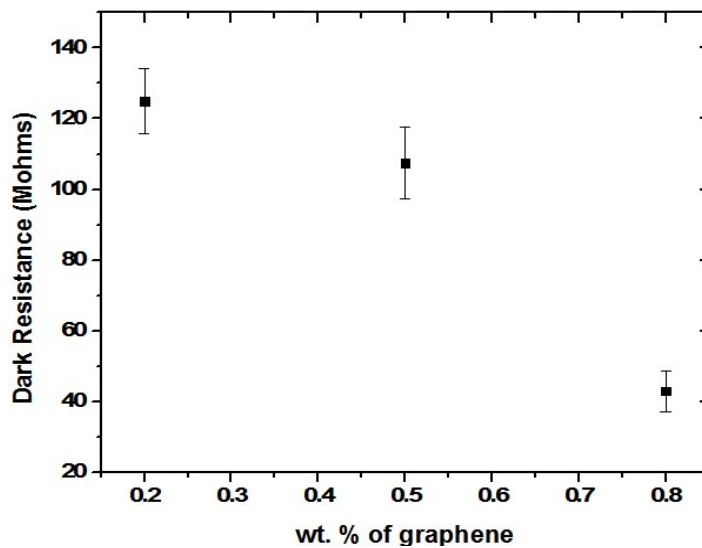

Fig S2: Plot of dark resistance values obtained for different wt. % of graphene in Gr-ZnO composite fiber. Each data point is an average of measurements from 4 devices and error bars represent +/-1 S.D.

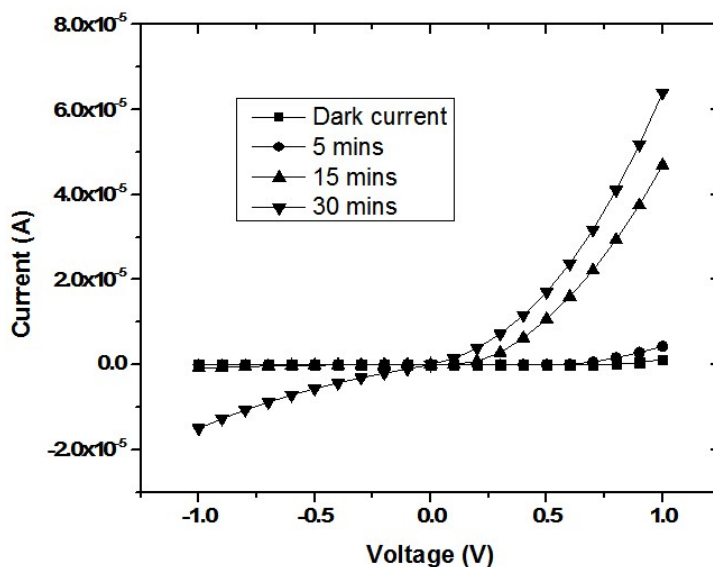

Fig S3: I-V curves of a typical Gr-ZnO device with 0.2 wt. % of Gr with and without UV illumination at various time instants
